# Supplementary material for: Fusing Docking Scoring Functions Improves the Virtual Screening Performance for Discovering Parkinson’s Disease Dual Target Ligands
Source: PubMed Central journal article supplement — Curr Neuropharmacol. 2017 Nov;15(8):1107–16. doi: 10.2174/1570159X15666170109143757 (PMC5725543; doi:10.2174/1570159x15666170109143757), 2017-11
Supplement: CN-15-1107_SD1.pdf [file CN-15-1107_SD1.pdf]

## SUPPLEMENTARY MATERIAL

### Fusing Docking Scoring Functions Improves the Virtual Screening Performance for Discovering Parkinson's Disease Dual Target Ligands

Yunierkis Perez-Castillo<sup>a,b,\*</sup>, Aliuska Morales Helguera<sup>b</sup>, M. Natália D. S. Cordeiro<sup>c</sup>, Eduardo Tejera<sup>d</sup>, Cesar Paz-y-Miño<sup>d</sup>, Aminaél Sánchez-Rodríguez<sup>e</sup>, Fernanda Borges<sup>h,\*</sup> and Maykel Cruz-Monteagudo<sup>d,h</sup>

<sup>a</sup>Sección Físico Química y Matemáticas, Departamento de Química, Universidad Técnica Particular de Loja, San Cayetano Alto S/N, EC1101608 Loja, Ecuador; <sup>b</sup>Molecular Simulation and Drug Design Group, Centro de Bioactivos Químicos (CBQ), Universidad Central "Marta Abreu" de Las Villas, Santa Clara, 54830, Cuba; <sup>c</sup>REQUIMTE, Department of Chemistry and Biochemistry, Faculty of Sciences, University of Porto, 4169-007 Porto, Portugal; <sup>d</sup>Instituto de Investigaciones Biomédicas (IIB), Universidad de Las Américas, 170513 Quito, Ecuador; <sup>e</sup>Departamento de Ciencias Naturales, Universidad Técnica Particular de Loja, Calle Paris S/N, EC1101608 Loja, Ecuador; <sup>f</sup>Departamento de Química Orgánica, Facultade de Química, Universidade de Vigo, 36310 Vigo, Spain; <sup>g</sup>Instituto de Investigación Biomédica (IVIB), Universidade de Vigo, 36310 Vigo, Spain; <sup>h</sup>CIQUP/Departamento de Química e Bioquímica, Facultade de Ciências, Universidade do Porto, Porto 4169-007, Portugal

#### SUPPLEMENTARY MATERIAL

SI\_File\_1: Dataset of known dual ligands and DUD-E decoys.

SI\_File\_2: Dataset of known dual ligands and desirability-based decoys.

SI\_File\_3: File containing the tables with the VS performance of each single scoring function as well as the performance of the assayed FS at different selection sizes of the ranked list.

**Table TS1. VS performance of each individual scoring function in each target (DUD-E decoys).**

| Scoring Function              | EF % <sup>a</sup> |      |      | BEDROC Alpha <sup>b</sup> |      |      | ROC <sup>c</sup> |
|-------------------------------|-------------------|------|------|---------------------------|------|------|------------------|
|                               | 1                 | 5    | 8    | 160.9                     | 32   | 20   |                  |
| <b>A2A</b>                    |                   |      |      |                           |      |      |                  |
| Grid Score                    | 0.00              | 0.00 | 2.49 | 0.00                      | 0.04 | 0.09 | 0.73             |
| PB/SA Score                   | 0.00              | 2.49 | 1.87 | 0.00                      | 0.08 | 0.12 | 0.72             |
| GB/SA Score                   | 5.67              | 3.73 | 3.73 | 0.20                      | 0.18 | 0.21 | 0.73             |
| SA_Descriptor Score           | 0.00              | 1.24 | 0.62 | 0.00                      | 0.03 | 0.05 | 0.50             |
| Continuous Score              | 0.00              | 1.24 | 1.87 | 0.00                      | 0.05 | 0.09 | 0.71             |
| Amber Score, everything rigid | 0.00              | 0.00 | 0.00 | 0.00                      | 0.00 | 0.02 | 0.54             |
| Amber Score, flexible ligand  | 0.00              | 0.00 | 1.24 | 0.00                      | 0.02 | 0.05 | 0.56             |
| <b>MAO-B</b>                  |                   |      |      |                           |      |      |                  |
| Grid Score                    | 11.33             | 6.22 | 4.98 | 0.15                      | 0.28 | 0.35 | 0.85             |
| PB/SA Score                   | 5.67              | 6.22 | 4.98 | 0.09                      | 0.22 | 0.31 | 0.85             |
| GB/SA Score                   | 5.67              | 3.73 | 4.98 | 0.07                      | 0.15 | 0.22 | 0.83             |
| SA_Descriptor Score           | 0.00              | 1.24 | 1.24 | 0.00                      | 0.04 | 0.08 | 0.73             |
| Continuous Score              | 5.67              | 7.46 | 4.98 | 0.08                      | 0.28 | 0.37 | 0.86             |
| Amber Score, everything rigid | 0.00              | 1.24 | 3.73 | 0.00                      | 0.07 | 0.13 | 0.80             |
| Amber Score, flexible ligand  | 0.00              | 0.00 | 3.11 | 0.00                      | 0.04 | 0.10 | 0.79             |

<sup>a</sup>Enrichment factor of the model at selection sizes of 1%, 5% and 8% of screened data. <sup>b</sup>BEDROC for values of the  $\alpha$  parameter of 160.9, 32.2 and 20. <sup>c</sup>Area under the ROC curve.

Table TS2. VS performance of each individual scoring function in each target (desirability-based decoys).

| Scoring Function              | EF % <sup>a</sup> |      |      | BEDROC Alpha <sup>b</sup> |      |      | ROC <sup>c</sup> |
|-------------------------------|-------------------|------|------|---------------------------|------|------|------------------|
|                               | 1                 | 5    | 8    | 160.9                     | 32   | 20   |                  |
| <b>A2A</b>                    |                   |      |      |                           |      |      |                  |
| Grid Score                    | 0.00              | 2.50 | 3.12 | 0.00                      | 0.07 | 0.15 | 0.83             |
| PB/SA Score                   | 6.23              | 1.25 | 3.75 | 0.02                      | 0.08 | 0.14 | 0.77             |
| GB/SA Score                   | 6.23              | 5.00 | 4.37 | 0.07                      | 0.18 | 0.24 | 0.83             |
| SA_Descriptor Score           | 0.00              | 0.00 | 0.62 | 0.00                      | 0.01 | 0.02 | 0.53             |
| Continuous Score              | 0.00              | 2.50 | 3.12 | 0.00                      | 0.07 | 0.15 | 0.83             |
| Amber Score, everything rigid | 0.00              | 1.25 | 2.50 | 0.00                      | 0.03 | 0.07 | 0.66             |
| Amber Score, flexible ligand  | 0.00              | 2.50 | 1.87 | 0.00                      | 0.05 | 0.09 | 0.68             |
| <b>MAO-B</b>                  |                   |      |      |                           |      |      |                  |
| Grid Score                    | 6.23              | 3.75 | 4.37 | 0.02                      | 0.13 | 0.20 | 0.83             |
| PB/SA Score                   | 0.00              | 3.75 | 3.12 | 0.01                      | 0.11 | 0.18 | 0.82             |
| GB/SA Score                   | 6.23              | 2.50 | 5.00 | 0.02                      | 0.10 | 0.17 | 0.83             |
| SA_Descriptor Score           | 0.00              | 2.50 | 1.25 | 0.01                      | 0.06 | 0.09 | 0.71             |
| Continuous Score              | 0.00              | 5.00 | 5.00 | 0.01                      | 0.16 | 0.24 | 0.84             |
| Amber Score, everything rigid | 0.00              | 1.25 | 1.87 | 0.00                      | 0.04 | 0.09 | 0.78             |
| Amber Score, flexible ligand  | 0.00              | 0.00 | 3.12 | 0.00                      | 0.03 | 0.09 | 0.80             |

<sup>a</sup>Enrichment factor of the model at selection sizes of 1%, 5% and 8% of screened data. <sup>b</sup>BEDROC for values of the  $\alpha$  parameter of 160.9, 32.2 and 20. <sup>c</sup>Area under the ROC curve.

Table TS3. Virtual screening performance of the assayed FS for the DUD-E decoys.

| FS Method <sup>a</sup>                      | EF <sup>b</sup> | BEDROC <sup>c</sup> | AUAC <sup>d</sup> | Fused Scoring Functions <sup>e</sup>             |
|---------------------------------------------|-----------------|---------------------|-------------------|--------------------------------------------------|
| <b>Selection Size 1% of the ranked list</b> |                 |                     |                   |                                                  |
| FS1.1                                       | 11.33           | 0.23                | 0.83              | A <sub>2A</sub> AR: 3 7 MAO-B: 1 3 4             |
| FS1.2                                       | 11.33           | 0.20                | 0.90              | A <sub>2A</sub> AR: 3 7 MAO-B: 1 3 4             |
| FS1.3                                       | 11.33           | 0.10                | 0.81              | A <sub>2A</sub> AR: 3 7 MAO-B: 1 2 3 4 5         |
| FS1.4                                       | 11.33           | 0.12                | 0.87              | A <sub>2A</sub> AR: 3 7 MAO-B: 1 2 3 4 5         |
| FS1.5                                       | 5.67            | 0.06                | 0.85              | A <sub>2A</sub> AR: 3 MAO-B: 1 3 4               |
| FS1.6                                       | 0.00            | 0.02                | 0.89              | A <sub>2A</sub> AR: 3 MAO-B: 1 3 4               |
| FS1.7                                       | 0.00            | 0.00                | 0.83              | A <sub>2A</sub> AR: 3 MAO-B: 1 3 4 5             |
| FS1.8                                       | 0.00            | 0.00                | 0.85              | A <sub>2A</sub> AR: 3 MAO-B: 1 3 4 5             |
| FS2.1                                       | 22.67           | 0.22                | 0.87              | A <sub>2A</sub> AR: 2, 3, 7 MAO-B: 1, 4, 5       |
| FS2.2                                       | 17.00           | 0.19                | 0.83              | A <sub>2A</sub> AR: 3, 7 MAO-B: 5                |
| FS2.3                                       | 5.67            | 0.19                | 0.75              | A <sub>2A</sub> AR: 4 MAO-B: 3                   |
| FS2.4                                       | 5.67            | 0.09                | 0.82              | A <sub>2A</sub> AR: 1, 2, 3 MAO-B: 4             |
| <b>Selection Size 5% of the ranked list</b> |                 |                     |                   |                                                  |
| FS1.1                                       | 8.71            | 0.34                | 0.83              | A <sub>2A</sub> AR: 3 7 MAO-B: 1 2 3 4 5         |
| FS1.2                                       | 8.71            | 0.34                | 0.89              | A <sub>2A</sub> AR: 3 7 MAO-B: 1 2 3 4 5         |
| FS1.3                                       | 6.22            | 0.27                | 0.85              | MAO-B: 1, 5 A <sub>2A</sub> AR: 2, 3, 7          |
| FS1.4                                       | 11.20           | 0.33                | 0.89              | MAO-B: 1, 5 A <sub>2A</sub> AR: 2, 3, 7          |
| FS1.5                                       | 4.98            | 0.19                | 0.85              | A <sub>2A</sub> AR: 3 MAO-B: 1 3 4               |
| FS1.6                                       | 6.22            | 0.19                | 0.89              | A <sub>2A</sub> AR: 3 MAO-B: 1 3 4               |
| FS1.7                                       | 2.49            | 0.10                | 0.84              | MAO-B: 3, 4 A <sub>2A</sub> AR: 3                |
| FS1.8                                       | 2.49            | 0.09                | 0.85              | MAO-B: 3, 4 A <sub>2A</sub> AR: 3                |
| FS2.1                                       | 13.68           | 0.37                | 0.90              | MAO-B: 1, 2, 4, 5 A <sub>2A</sub> AR: 2, 3       |
| FS2.2                                       | 12.44           | 0.31                | 0.87              | MAO-B: 1, 5 A <sub>2A</sub> AR: 3, 6             |
| FS2.3                                       | 7.46            | 0.33                | 0.88              | MAO-B: 1, 3, 4                                   |
| FS2.4                                       | 4.98            | 0.15                | 0.83              | MAO-B: 3 4                                       |
| <b>Selection Size 8% of the ranked list</b> |                 |                     |                   |                                                  |
| FS1.1                                       | 4.35            | 0.36                | 0.87              | MAO-B: 1 3 4 5 A <sub>2A</sub> AR: 3             |
| FS1.2                                       | 6.84            | 0.46                | 0.92              | MAO-B: 1 3 4 5 A <sub>2A</sub> AR: 3             |
| FS1.3                                       | 4.98            | 0.33                | 0.87              | MAO-B: 3 4 5 A <sub>2A</sub> AR: 3               |
| FS1.4                                       | 6.22            | 0.37                | 0.91              | MAO-B: 3 4 5 A <sub>2A</sub> AR: 3               |
| FS1.5                                       | 3.73            | 0.21                | 0.79              | MAO-B: 1 2 3 4 5 A <sub>2A</sub> AR: 3, 7        |
| FS1.6                                       | 3.73            | 0.22                | 0.85              | MAO-B: 1 2 3 4 5 A <sub>2A</sub> AR: 3, 7        |
| FS1.7                                       | 3.73            | 0.17                | 0.84              | MAO-B: 1 3 4 A <sub>2A</sub> AR: 3               |
| FS1.8                                       | 3.73            | 0.16                | 0.86              | MAO-B: 1 3 4 A <sub>2A</sub> AR: 3               |
| FS2.1                                       | 8.09            | 0.51                | 0.91              | MAO-B: 1, 2, 3, 4, 5 A <sub>2A</sub> AR: 1, 2, 3 |
| FS2.2                                       | 8.71            | 0.38                | 0.93              | MAO-B: 1, 3, 5 A <sub>2A</sub> AR: 1, 2, 3       |
| FS2.3                                       | 7.46            | 0.37                | 0.87              | MAO-B: 1, 2, 3, 4, 5                             |
| FS2.4                                       | 4.98            | 0.24                | 0.85              | MAO-B: 1 3 4                                     |

<sup>a</sup>Employed fusion method. See Tables 2 and 3 for the detailed setup of each method. <sup>b</sup>Enrichment Factor for the best scoring scheme. <sup>c</sup>BEDROC for the best scoring scheme. Alpha value is set to 160.9. <sup>d</sup>Area Under the Accumulative Curve for the best scoring scheme. <sup>e</sup>Scoring functions fused in the best scoring scheme. The following numbering is employed for scoring functions: 1) Grid Score; 2) PB/SA Score; 3) GB/SA Score; 4) SA\_Descriptor Score; 5) Continuous Score; 6) Amber Score, everything rigid and 7) Amber Score, flexible ligand.

Table TS4. Virtual screening performance of the assayed FS for the DUD-E decoys.

| FS Method <sup>a</sup>                      | EF <sup>b</sup> | BEDROC <sup>c</sup> | AUAC <sup>d</sup> | Fused Scoring Functions <sup>e</sup>             |
|---------------------------------------------|-----------------|---------------------|-------------------|--------------------------------------------------|
| <b>Selection Size 1% of the ranked list</b> |                 |                     |                   |                                                  |
| FS1.1                                       | 0.00            | 0.02                | 0.88              | A <sub>2A</sub> AR: 3 7 MAO-B: 1 3               |
| FS1.2                                       | 12.47           | 0.05                | 0.90              | A <sub>2A</sub> AR: 3 7 MAO-B: 1 3               |
| FS1.3                                       | 6.23            | 0.03                | 0.91              | A <sub>2A</sub> AR: 2 3 MAO-B: 1 3               |
| FS1.4                                       | 6.23            | 0.06                | 0.90              | A <sub>2A</sub> AR: 2 3 MAO-B: 1 3               |
| FS1.5                                       | 0.00            | 0.00                | 0.76              | A <sub>2A</sub> AR: 3 4 6 7 MAO-B: 1 3           |
| FS1.6                                       | 0.00            | 0.00                | 0.77              | A <sub>2A</sub> AR: 3 4 6 7 MAO-B: 1 3           |
| FS1.7                                       | 0.00            | 0.00                | 0.82              | A <sub>2A</sub> AR: 3 MAO-B: 1 3                 |
| FS1.8                                       | 0.00            | 0.00                | 0.81              | A <sub>2A</sub> AR: 3 MAO-B: 1 3                 |
| FS2.1                                       | 31.17           | 0.11                | 0.87              | A <sub>2A</sub> AR: 3, 5, 6, 7 MAO-B: 3, 4       |
| FS2.2                                       | 18.70           | 0.10                | 0.86              | A <sub>2A</sub> AR: 2, 3, 7 MAO-B: 3             |
| FS2.3                                       | 6.23            | 0.07                | 0.84              | A <sub>2A</sub> AR: 3 MAO-B: 4                   |
| FS2.4                                       | 6.23            | 0.05                | 0.76              | A <sub>2A</sub> AR: 3 MAO-B: 4                   |
| <b>Selection Size 5% of the ranked list</b> |                 |                     |                   |                                                  |
| FS1.1                                       | 10.00           | 0.28                | 0.92              | MAO-B: 1 3 4 5 A <sub>2A</sub> AR: 1, 3, 7       |
| FS1.2                                       | 11.25           | 0.28                | 0.92              | MAO-B: 1 3 4 5 A <sub>2A</sub> AR: 1, 3, 7       |
| FS1.3                                       | 3.75            | 0.17                | 0.88              | MAO-B: 1 4 A <sub>2A</sub> AR: 2, 3, 7           |
| FS1.4                                       | 5.00            | 0.19                | 0.88              | MAO-B: 1 4 A <sub>2A</sub> AR: 2, 3, 7           |
| FS1.5                                       | 5.00            | 0.15                | 0.86              | MAO-B: 3 4 A <sub>2A</sub> AR: 3, 7              |
| FS1.6                                       | 5.00            | 0.11                | 0.85              | MAO-B: 3 4 A <sub>2A</sub> AR: 3, 7              |
| FS1.7                                       | 3.75            | 0.10                | 0.83              | MAO-B: 3 4 A <sub>2A</sub> AR: 3, 7              |
| FS1.8                                       | 1.25            | 0.07                | 0.81              | MAO-B: 3 4 A <sub>2A</sub> AR: 3, 7              |
| FS2.1                                       | 15.00           | 0.32                | 0.92              | MAO-B: 4, 5, 7 A <sub>2A</sub> AR: 3, 5          |
| FS2.2                                       | 10.00           | 0.26                | 0.93              | MAOB: 3, 5 A <sub>2A</sub> : 3, 5                |
| FS2.3                                       | 6.25            | 0.18                | 0.90              | MAO-B: 3, 4 A <sub>2A</sub> AR: 3                |
| FS2.4                                       | 3.75            | 0.09                | 0.85              | MAOB: 3, 4                                       |
| <b>Selection Size 8% of the ranked list</b> |                 |                     |                   |                                                  |
| FS1.1                                       | 8.75            | 0.48                | 0.93              | MAO-B: 1 3 4 5 A <sub>2A</sub> AR: 3, 5          |
| FS1.2                                       | 8.12            | 0.41                | 0.93              | MAO-B: 1 3 4 5 A <sub>2A</sub> AR: 3, 5          |
| FS1.3                                       | 8.75            | 0.41                | 0.93              | MAO-B: 1 3 4 5 7 A <sub>2A</sub> AR: 3, 5        |
| FS1.4                                       | 7.50            | 0.34                | 0.92              | MAO-B: 1 3 4 5 7 A <sub>2A</sub> AR: 3, 5        |
| FS1.5                                       | 3.12            | 0.12                | 0.83              | MAO-B: 1 3 4 5 A <sub>2A</sub> AR: 3, 7          |
| FS1.6                                       | 2.50            | 0.12                | 0.84              | MAO-B: 1 3 4 5 A <sub>2A</sub> AR: 3, 7          |
| FS1.7                                       | 2.50            | 0.16                | 0.83              | MAO-B: 3 4 A <sub>2A</sub> AR: 3, 7              |
| FS1.8                                       | 1.87            | 0.12                | 0.81              | MAO-B: 3 4 A <sub>2A</sub> AR: 3, 7              |
| FS2.1                                       | 8.75            | 0.48                | 0.93              | MAO-B: 3, 7 A <sub>2A</sub> AR: 1, 3, 5          |
| FS2.2                                       | 8.75            | 0.32                | 0.92              | MAOB: 1, 2, 3, 4, 5 A <sub>2A</sub> : 1, 3, 5, 6 |
| FS2.3                                       | 6.87            | 0.23                | 0.89              | MAO-B: 3, 4, 7 A <sub>2A</sub> AR: 3             |
| FS2.4                                       | 3.75            | 0.16                | 0.85              | MAOB: 3, 4                                       |

<sup>a</sup>Employed fusion method. See Tables 2 and 3 for the detailed setup of each method. <sup>b</sup>Enrichment Factor for the best scoring scheme. <sup>c</sup>BEDROC for the best scoring scheme. Alpha value is set to 160.9. <sup>d</sup>Area Under the Accumulative Curve for the best scoring scheme. <sup>e</sup>Scoring functions fused in the best scoring scheme. The following numbering is employed for scoring functions: 1) Grid Score; 2) PB/SA Score; 3) GB/SA Score; 4) SA\_Descriptor Score; 5) Continuous Score; 6) Amber Score, everything rigid and 7) Amber Score, flexible ligand.
